# Supplementary material
Source: HighWire-hosted journal article supplement (https://svn.smart01.highwire.org/content/9/4/380)
Supplement: inline-supplementary-material-1 [file inline-supplementary-material-1.pdf]

# **Economic burden of ischemic stroke patients in China**

## **Patient survey**

## A. Patient Survey

### Basic Information

**A1.** Patient number: \_\_\_\_\_

**A2.** Patient education level: ☐1-College or above ☐2-High school

☐3-Middle school ☐4-Primary school ☐5-Illiterate

**A3.** In the first year after patient's first-ever ischemic stroke (referred to hereafter as the **index event**), which hospital did the patient mainly go to for post-stroke treatment: \_\_\_\_\_

**A3.1** If patient used a medical insurance card at the above hospital, the card number was:

**A3.2** In the first year after the index event, how many outpatient visits did the patient have at the above hospital (answer 0 if none):

times

**A3.3** In the first year after the index event, how many days was the patient hospitalized at the above hospital (answer 0 if none):

days

**A3.3.1.** If more than 0 days, who attended the patient at the hospital:

☐1-Family members only ☐2-Caretakers only ☐3-Family members and caretakers

**Economic burden during the index event\***

\*For numeric questions, please answer with specific numbers; rounded estimates can be accepted

**A4.** Which type of transport did patient use to travel to hospital for the index event: ☐ 1-Ambulance ☐ 2-Patient' s own car ☐ 3-Taxi ☐ 4-Other

**A5.** Distance from patient' s residence to hospital:  kilometers

**A6.** Days of hospitalization during the index event:  days

**A7.** During the index event, for how many days did a caretaker(s) attend to the patient (answer 0 if not applicable):  days

**A8.** During the index event, if a caretaker(s) attended to the patient, the cost per day for the caretaker(s) was (answer 0 if not applicable):   
,  CNY

**A9.** Where did family members stay during the patient' s hospitalization: ☐ 1-Hotel ☐ 2-Home ☐ 3-Family members did not attend the patient

**A9.1** If "hotel" is chosen, then the cost per day for food and accommodations was: ,  CNY

**Economic burden during the first year after the index event**

**A10.** Household monthly income during the first year after the index event (including all members of the household; if patient' s child(ren) do not live in the same household, then the child(ren)' s income(s) should not be included):

☐ 1-<3000 CNY   ☐ 2-3001~8000 CNY   ☐ 3-8001~20000 CNY   ☐ 4-> 20000 CNY

**A11.** Work status before the index event:

☐ 1-Employed full time or part-time/farmwork   ☐ 2-Unemployed/retired/stopped farmwork

**A11.1** If “employed full time or part-time/farmwork” is chosen, then the patient’s work status in the first year after the index event:

☐ 1- Employed full time or part-time/farmwork   ☐ 2-Retired/stopped farmwork for reasons unrelated to stroke   ☐ 3-Early retirement/stopped farmwork for reasons related to stroke

**A11.1.1.** If “employed full time or part-time/farmwork” is chosen, then the number of days that the patient was unable to work for reasons related to stroke was:  days

**A11.1.2.** If “early retirement/stopped farmwork for reasons related to stroke” is chosen, then the age at which the patient retired/stopped farmwork was:  years of age

**A12.** The total cost of rehabilitation in the first year after the index event (answer 0 if not applicable): ,  CNY

**A13.** The monthly cost of caretaker(s) in the first year after the index event (answer 0 if not applicable): ,  CNY

**A14.** Aside from caretaker(s), did the patient’s family members need to take care of the patient:

☐1-No    ☐2-Yes

**A14.1** If “yes” is chosen, then for how many days each month was the patient’s family member(s) unable to work because they needed to take care of the patient (answer 0 if not applicable; assuming 8 hours per day):  days

**A15.** In the first year after stroke, aside from hospital prescriptions, the total cost of supportive care (including health supplements, diet regimens, self-purchased medical devices, etc.): ,  CNY
